# Supplementary material for: The “Special” crystal-Stellate System in Drosophila melanogaster Reveals Mechanisms Underlying piRNA Pathway-Mediated Canalization
Source: PubMed Central journal article supplement (PMC3335654; doi:10.1155/2012/324293), 2011-12-15
Supplement: 324293.f1.pdf [file 324293.f1.pdf]

1 aacttattat gaaataaaag aactaatact tattatgcc a gccgaacata aaacgaattt tgcagtgctag agttcccatc tgcaagggca tgacagagctc  
 101 ctggcaaaga cactagaata acaagatgca taacgacat acattggttt ggcactatgc agccactttt ttagtgacgg ccaaaattgc tctctttcca  
 201 ctcgctcag ctgagagcgt aagaaatcta aaaatagaat ttgcttgctt gtgtgagtaa aaacaagaga cgagaacgcg tacgcgtata tgtgtgcgtg  
 301 ttgtggtaga cgattttcgg gccgaaataa attctgatcg aagaaacgaa tttatactgt acatattagg gtagttttt ccaatttcgt agcaatatga  
 401 taaaataaaa taatttttaa aaaaattaaa gcttttttaa ttcgtttctt aaaatcgccg ctcgaattag ctaccgttta cacatttata tttatgttta  
 501 attctaattt gtctctcatc tgacaatctt ttaaaagcga aatattttt tgaaacactt ttaatcttaa tgttacatga tattaagtca aatgacttaa  
 601 taaatgtact aaataattta aggaagtaca atagaaatta ttatagctac tgtaatttca taaattttct aaaaagaaga cattacgttg agaaataaat  
 701 atttcataaa aataaattta taaaataaat aaacatataa cggtttattg caaaagtc atcaaaggca ctagaattat tctagtgtct ttgctttggt  
 801 catatcttga ggcacgaagt gcgacacaca gcaactcaaca attattgcct aattattttt tcacacgacg caagatcaat actctaataa caaatattct  
 901 tatatagtca ttttttaaat ttattttgtg ataatatgta catagatttg gctattttct atctattttc aaataataat aacgttaagg caatgcaaaa  
 1001 caagaatttt tgcgatggtg ccaattgatc aaaaataata tagattttaa gtctaagaac ttctgaggtg aagggcatat tttgtcaaat ttatatacat  
 1101 acagctgtct gctatcactg tatgcgaga agtgctgttc gctgtagcgc tctccgctct ctcgctctct aacaaaaatt cgagagagcc tggagccacc  
 1201 tctagagcca cggcgaaaa atcgtatggc gttatgcac ttattatttt agtgtctttg gtccctgtcaa cccttttagc aagtgtcaaa aactcaaaaga

AUB-crystal-specific piRNA(-)

1301 aaaagacgat gactttgaag tctacaagtc atatttctgt gaacgagtga actggcaacA TGtcgagcct gtaagtaact aggtttttcc tatagaaatt

AUB/AGO3-crystal-specific piRNA(-)22x AUB/AGO3-crystal-specific piRNA(+)-4x

1401 atagcaagtc acagtaaaat ctgaaacaca gaacaacaac aacaacagca gctggatcaa ttggtttctc ggaAtcaagg gcaacgagtt cctctgccac

AUB/AGO3-crystal-specific piRNA(-)7x AGO3 crystal-specific piRNA(+)-3x rasi1 (-) rasi4 (-)

1501 gtgccca cca actactttca ggacacgttc aaccagAtgg gcttgagta cttcagccag cactggacgt gatcctgaag ccggggttog acagtttoct  
 very abundant crystal-specific

AUB/AGO3 piRNAs (-) thousands x

1601 gggcttggctc tagcagatg agaaaaagtg gtacggcatg attcagccc gatacatcag gtccgagcgt ggcgtgaatg atatgcaccg aaactatatg

AGO3- piRNA(+)

Region producing many different crystal-specific AUB-piRNAs

1701 agaggagact ttgaatcgtg tccgaatata tctgttaata ggaagaaca c cctgccagtg ggccctcagcg atgtgtgggg caagtcaacg gtgaagatct

rasi2 (+)

1801 actgccacg ctgtaaaaac tacttccatc ctaaaactga tacacagcca tgttcgagcc cagcttcccg gacatctttct taacgcagct gccgaacttg

AGO3-crystal-specific piRNAs(-)(hundreds) AGO3-crystal/Stellate-specific piRNAs (-)11x

1901 agaccgcccc tggacgacc acggtaagta attctcagaa tatagtctg gttgttttct aaacaaagcg cttgaacttg cagtcctat gctttctggt

rasi3 (-)

2001 gcaccagaag gccttgatgc cacttaaatc gcccaagtcc tcaccaaga aatcggatc ctcggccagc tagtctctct cctcgccccg gcattccgaa

AUB-Su (Ste)4 (-)15 x AGO3-piRNA(+)

2101 gtcaagcgt tcaatgttct tctAgggatg acgtgatttt ttaactccac aaaaaagaaa gcagaaatgt ttgtccgata tattgttgtt gcaattaaac

rasi5 (-)

AUB-crystal-specific piRNA(-)102 x

2301 catatcaagc actcattcga gtagcaaagc atacctttcg ttaaatagtgg taatcacctg ggtataataa taatattaat caataaaaca ttcaattcag

2401 ttttttattt aattttatgt taaaagagtt tccaaaagtg ttttctgac tacatcaaat attttttgat aatttaattt ctttaaatat acaaattctg

2501 ttttaatgta ttataggagt gagtagaagg ttaaaacatt attttcaatt tcaaataaaa taaaatttt gattccatca tttttatgta attctttttg  
2601 tagagtattc aatactggca acttcgtatt ttagtttgat ttcccatgct gtttttggtt aatttccaac ataccagatt gatttcgcgc gtaaatttaa  
2701 acgcacttta ttgccttttt ggaagaacgt tgcttcaaaa cggaaaatcg aaggaaacc tgaccggacc taagggacag ccttggggggg aaaactggca  
2801 gtgcattttc ccagcccaa agattttccc cggcaagtcg ggg
