# Supplementary material for: The “Special” crystal-Stellate System in Drosophila melanogaster Reveals Mechanisms Underlying piRNA Pathway-Mediated Canalization
Source: PubMed Central journal article supplement (PMC3335654; doi:10.1155/2012/324293), 2011-12-15
Supplement: 324293.f2.pdf [file 324293.f2.pdf]

1 aattcagttt tctttaattt taattaattt ttttctaaga aaaataaata aaaacgaaaa **Ste<sup>het</sup> start** attcaataa aaattataaa aaataaacg agttgtgttt  
 101 tatttcacgt taaatagtta agtggaata taactgaatg gtaagtttat taattaattt aagtgttaaa aaattactga atttatagga ttttgatttg  
 201 gatactattt ataaaatcat ataaaaggcc atcgagtcct cagccgatgc tgccttgctg aaacaatgac atttgatttg tttttggccc aactgacaca  
 301 taaaatcgc tatgcataac atattatgaa ataaaagaac taataacttat tatgccagcc gaacataaaa cgaattttcg agtctagagt tcccatctgg  
*hoppel insertion in crystal*  
 401 aagggcaggc cttttagcac gtgtcaaaaa ctcaaagaag aagacgatga ctttgaagtc tacaagtcac atttctgtga tcaagtgaac tggcaac **ATG**  
 501 tcgagctcGT AAGTAACTAG GTTTTTCCTA TAGAAATTAT AGCAAGTCAC AGTAAAATCT TGTAGccaga acaacaacag cagctggatc gattggttcc  
 601 tccggatcaa gggcaaccag **ttcctctgcc gcgtgccac** cgactacgtg caggatagct tcaaccagat gggcttgagg tatttcagcg agatactgga  
 701 cgtgatcctg aagccgggtga tccgatagttc ctctggcttg ttgtacggcg atgaaaagaa gtggtacggc atgattccag cccgatacat caggtcagag  
 801 cgtggcctga ttgctatgca ccgaaaatat ttgcgaggag attttgatc gtgtccaat atctctgtg ataggcagaa caccctgcca gtgggcctca  
 901 gcgctgtatg gggcaagtca accgtcaaga tccactgccc acggtgtaaa agcaactttc atccgaagtc tgatacacag ctggacggag cgatgttcgg  
 1001 gcccagcttc ccggacatct ttttctcgct gtgccgaac ttgacatcgc ccttgacga cccacggtaa GTAATTC **TCC GAATATAGTC CTGGTTGTTT**  
 1101 TCTAACA AAA GCGCTTG CAC TTGCAGTacc taggctttcg gttgcaccaa agagctttga tgcaactcaa atcgccca gccaagaata tcggaatatt  
 1201 ggtcaggcgc atcaatgtat ttttgtatgt atattgtttg tgtttgtaatc aatacgaaaa atcaagaaca tattc

**AGO3-Ste<sup>eu</sup>/Ste<sup>het</sup> specific piRNA(+)**  
**AUB- Ste<sup>eu</sup> specific piRNA (+)**  
**AGO3-Ste<sup>het</sup> specific piRNA (+)**  
**AGO3-Ste<sup>eu</sup>/Ste<sup>het</sup> specific piRNA (+)**  
**AUB/AGO3-Ste<sup>eu</sup> specific piRNA(+)**  
**AGO3-crystal-Ste<sup>eu</sup> piRNA(-)11X**  
**Ste<sup>het</sup> end**  
 STOP
